# Supplementary material for: Single step eco-efficient mild chemical process for the total valorisation of rice husk: a focus on the inorganics as a cement additive
Source: Royal Society of Chemistry journal article supplement (doi:10.1039/d4ra05263c), 2024-01-01
Supplement: d4ra05263c1.pdf [file d4ra05263c1.pdf]

## Electronic Supplementary Information

# Single step eco-efficient mild chemical process for the total valorisation of rice husk: a focus on inorganics as cement additives

Eleonora Conterosito, Geo Paul, Valentina Toson, Valentina Gianotti, Marco Milanesio, Daniela Gastaldi, Enrico Boccaleri

| Phases                 | CEM I 42.5 R |
|------------------------|--------------|
| <b>C<sub>3</sub>S</b>  | 66.9         |
| <b>C<sub>2</sub>S</b>  | 7.2          |
| <b>C<sub>3</sub>A</b>  | 13.7         |
| <b>C<sub>4</sub>AF</b> | 3.6          |
| <b>Gypsum</b>          | 3.6          |
| <b>Other</b>           | 5            |

Table S1. Phase composition of CEM I 42.5 R

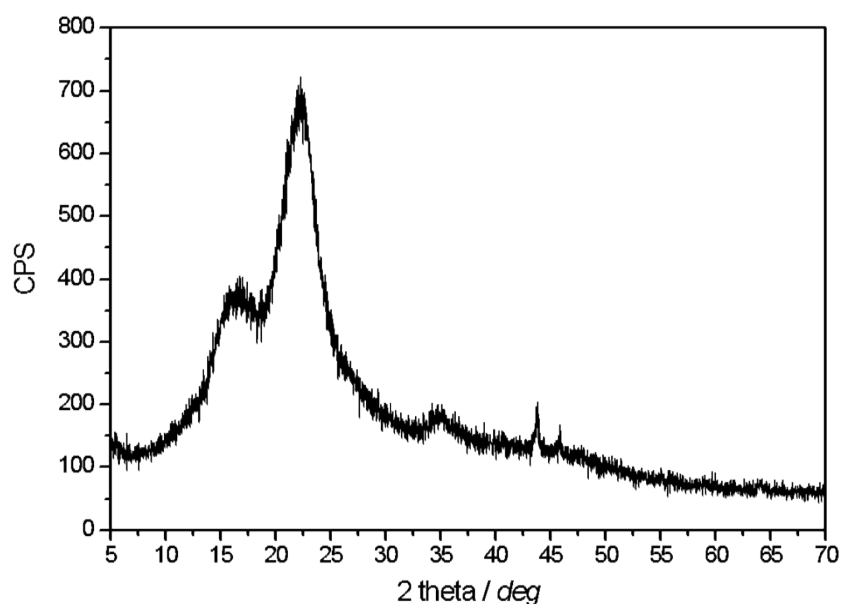

Figure S1. Powder X-ray diffraction of raw rice husk.

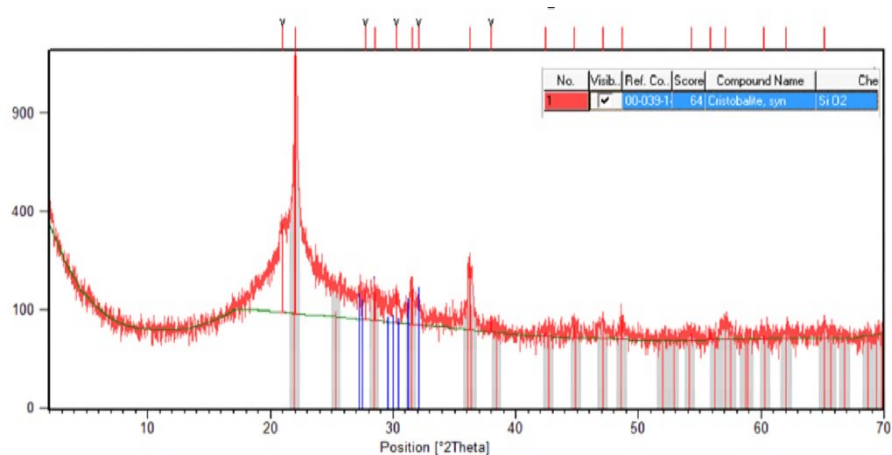

Figure S2. Powder X-ray diffraction of calcined rice husk and phase matching with cristobalite.

| Oxide                                                                                        | Wt%   |
|----------------------------------------------------------------------------------------------|-------|
| SiO <sub>2</sub>                                                                             | 85,64 |
| K <sub>2</sub> O                                                                             | 4,14  |
| CaO                                                                                          | 4,05  |
| SO <sub>3</sub>                                                                              | 1,40  |
| P <sub>2</sub> O <sub>5</sub>                                                                | 1,02  |
| Fe <sub>2</sub> O <sub>3</sub>                                                               | 0,96  |
| Cl                                                                                           | 0,84  |
| Al <sub>2</sub> O <sub>3</sub>                                                               | 0,74  |
| MnO                                                                                          | 0,59  |
| MgO                                                                                          | 0,37  |
| Na <sub>2</sub> O                                                                            | 0,08  |
| TiO <sub>2</sub>                                                                             | 0,06  |
| TOTAL ( SiO <sub>2</sub> + Al <sub>2</sub> O <sub>3</sub> + Fe <sub>2</sub> O <sub>3</sub> ) | 90.65 |

Table S2. Chemical composition of rice husk as determined by X-ray fluorescence analysis after calcination and expressed as % in weight (average error estimated  $\pm 2\%$ ).

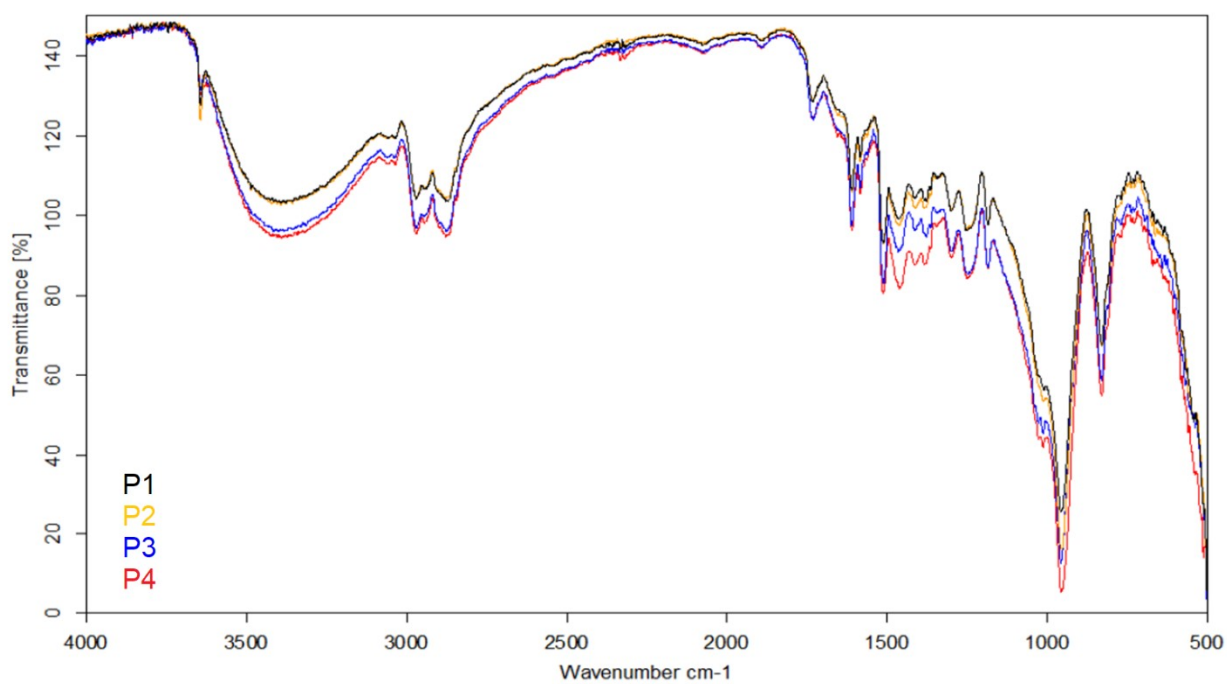

Figure S3. FT-IR ATR spectra of the precipitates: P1 (black), P2 (yellow), P3 (blue), P4 (red).

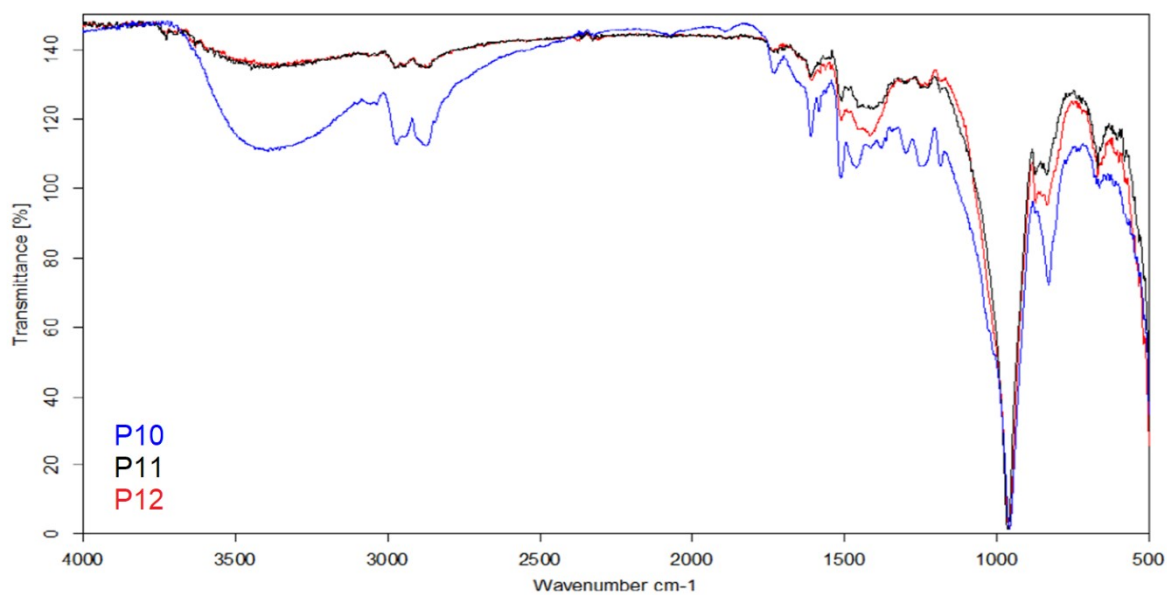

Figure S4. FT-IR ATR spectra of the precipitates: P10 (blue), P11(black) P12 (red).

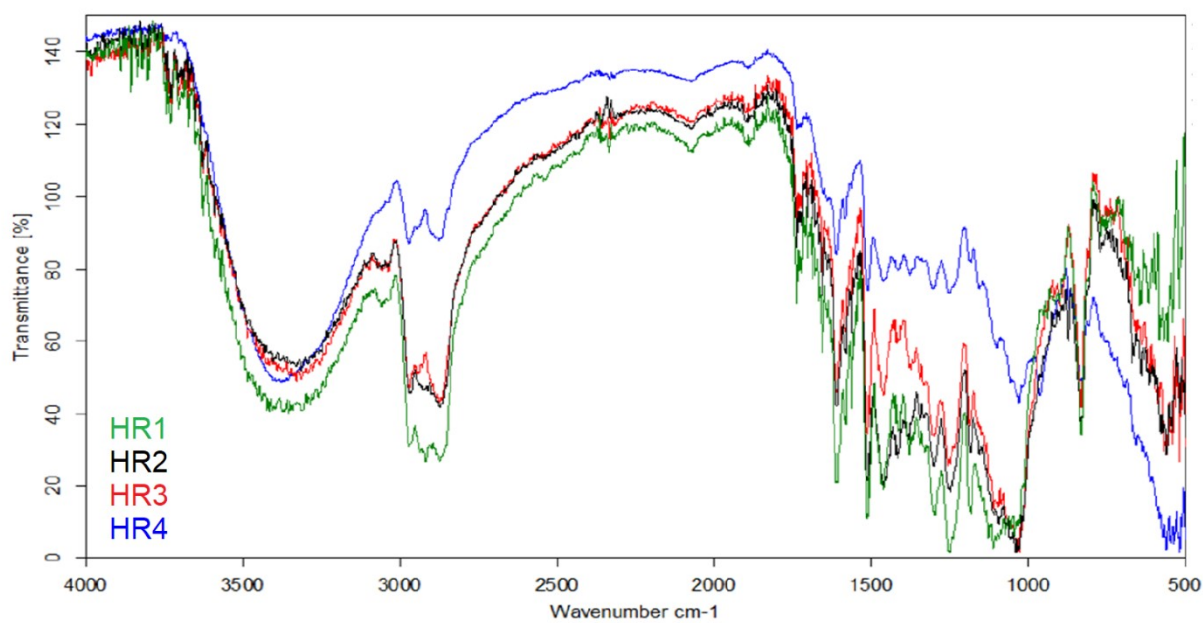

Figure S5. FT-IR ATR spectra of the husk residues: HR1(green), HR2 (black), HR3 (red), HR4 (blue).

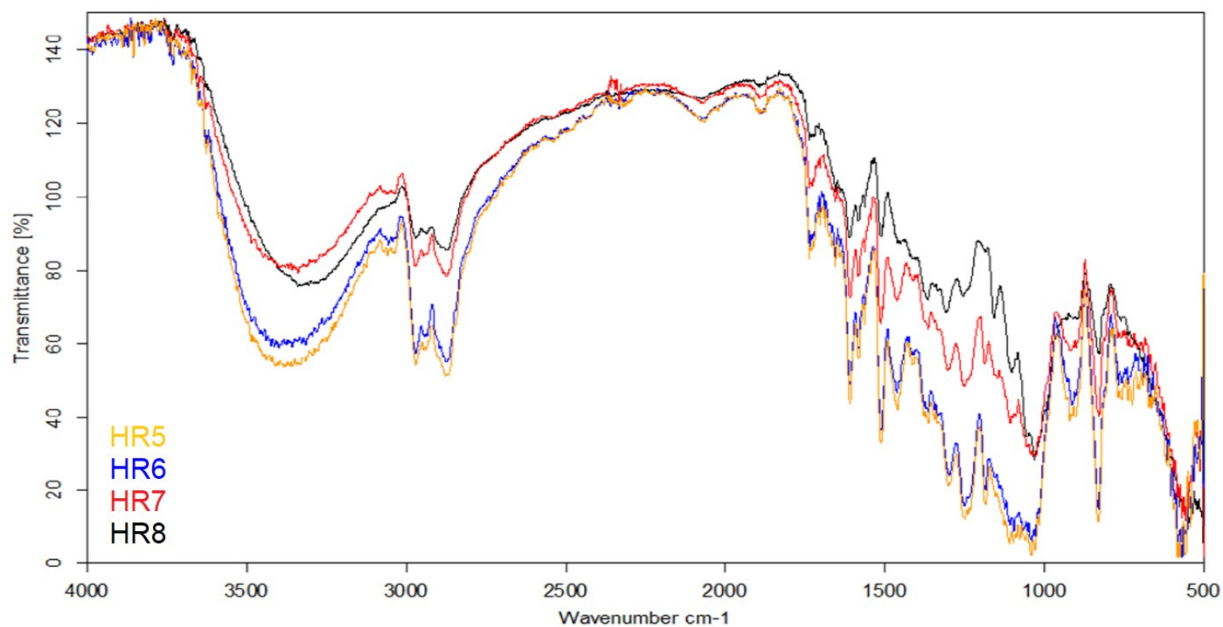

Figure S6. FT-IR ATR spectra of the husk residues: HR5(yellow), HR6 (blue), HR7 (red), HR8 (black).

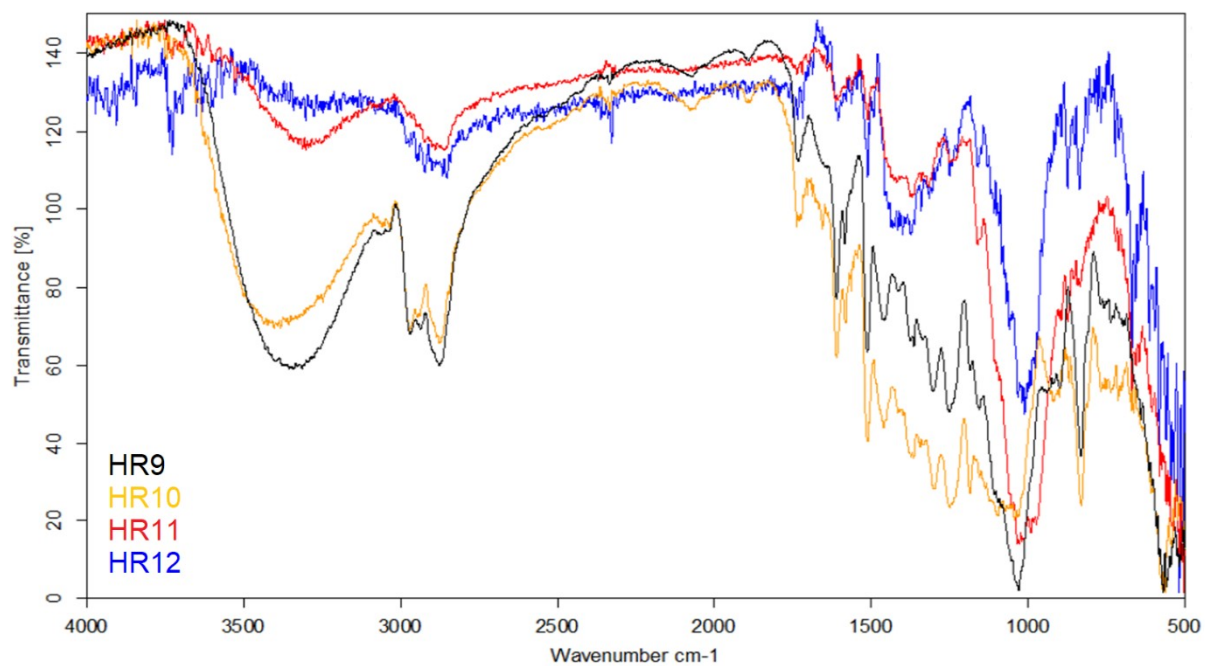

Figure S7. FT-IR ATR spectra of the husk residues: HR9(black), HR10 (yellow), HR11 (red), HR12 (blue).

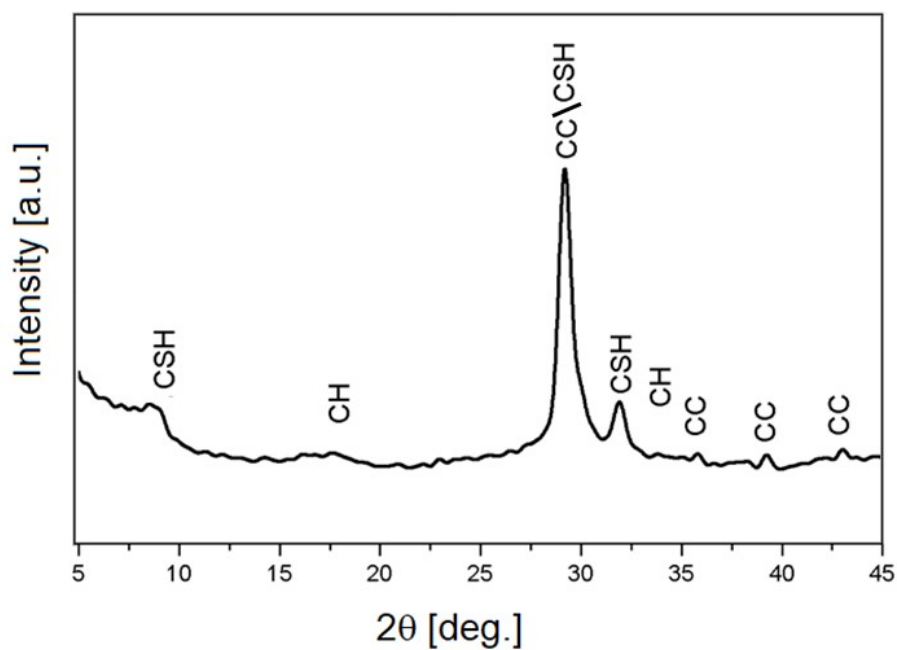

Figure S8. XRPD pattern of **P11b**.

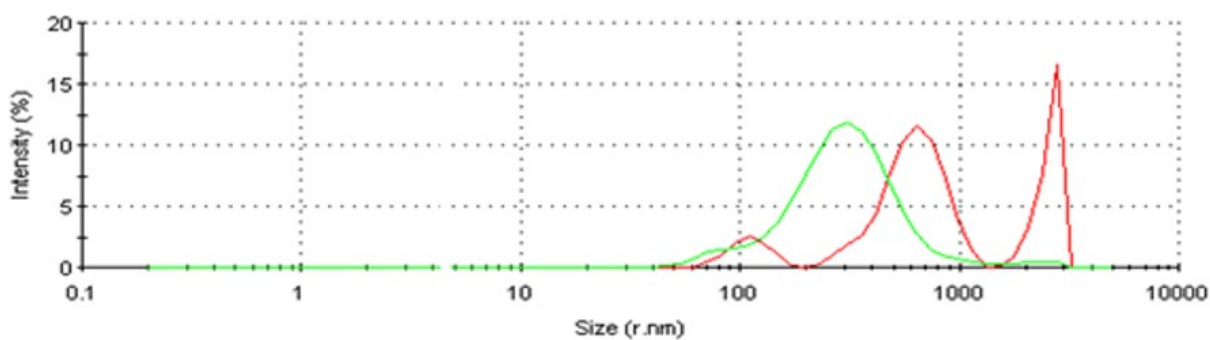

Figure S9. Size distribution by intensity from DLS analysis on the water dispersion prepared using a concentration of precipitate of 1g/L. Red curve measured right after the sonication - Green curve measured after 24 hours.

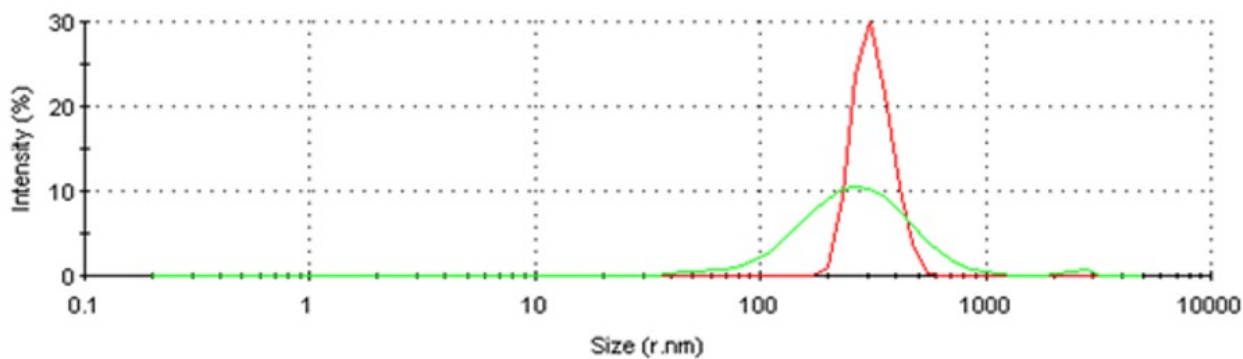

Figure S10. Size distribution by intensity from DLS analysis on the water dispersion prepared using a concentration of precipitate of 0.5g/L. Red curve measured right after the sonication - Green curve measured after 24 hours

| Element Symbol | Element Name | Atomic Conc. (%) |
|----------------|--------------|------------------|
| C              | Carbon       | 4.2              |
| O              | Oxygen       | 59.9             |
| Na             | Sodium       | 0.2              |
| Si             | Silicon      | 13.9             |
| K              | Potassium    | 2.7              |
| Ca             | Calcium      | 19.0             |

Table S3. Chemical composition of P11b sample as determined by Electron Dispersive X-Ray (EDX) Analysis expressed as atomic % (average error estimated  $\pm 0.3\%$ ).

| Mixture               | Compression strength at different ageing |                             |                             |                             |                             |
|-----------------------|------------------------------------------|-----------------------------|-----------------------------|-----------------------------|-----------------------------|
|                       | 16 h<br>(N/mm <sup>2</sup> )             | 1 d<br>(N/mm <sup>2</sup> ) | 2 d<br>(N/mm <sup>2</sup> ) | 3 d<br>(N/mm <sup>2</sup> ) | 7 d<br>(N/mm <sup>2</sup> ) |
| CEM                   | 8.93 $\pm$ 0.10                          | 17.28 $\pm$ 0.01            | 30.33 $\pm$ 0.36            | 36.88 $\pm$ 0.28            | 44.76                       |
| CEM-P <sub>ap</sub>   | 9.63 $\pm$ 0.07                          | 17.8 $\pm$ 0.1              | 30.15 $\pm$ 0.42            | 36.42 $\pm$ 0.97            | 40.47                       |
| CEM- P <sub>350</sub> | 10.61 $\pm$ 0.29                         | 19.49 $\pm$ 0.04            | 32.36 $\pm$ 0.56            | 39.64 $\pm$ 0.14            | 44.28                       |
| CEM- P <sub>650</sub> | 9.49 $\pm$ 0.11                          | 17.18 $\pm$ 0.14            | 31.41 $\pm$ 1.32            | 36.39 $\pm$ 0.10            | 44.16                       |

Table S4. Compressive strength of cement mortars samples at different ageing times.

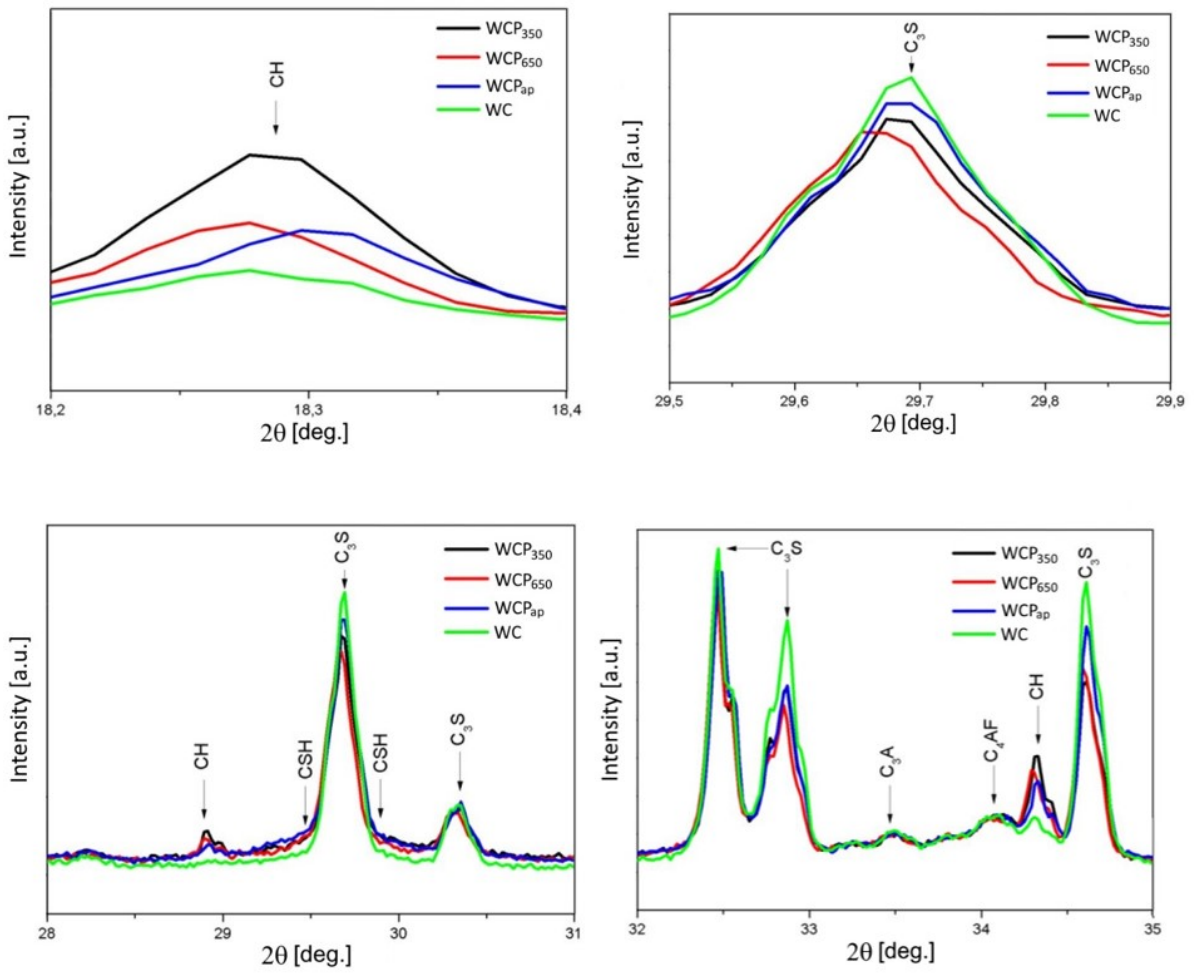

Figure S11. XRPD pattern of the mixtures of additive and cement after hydration.

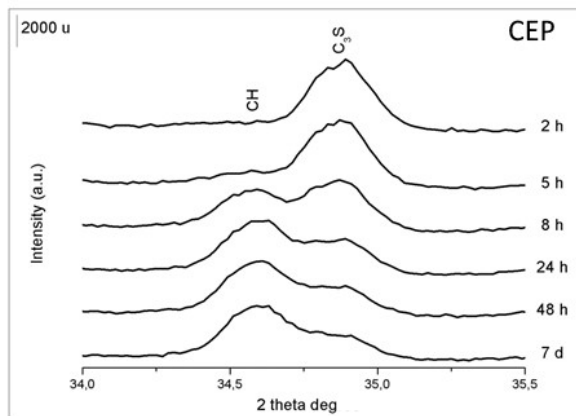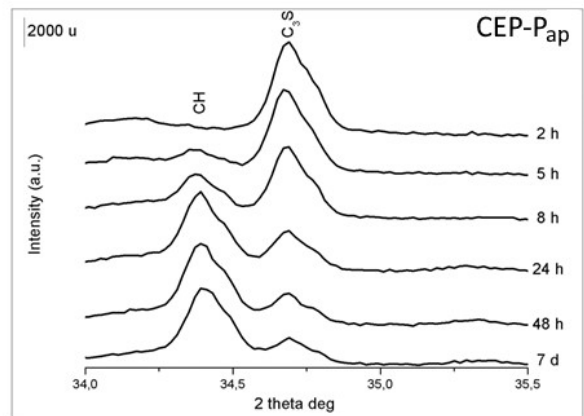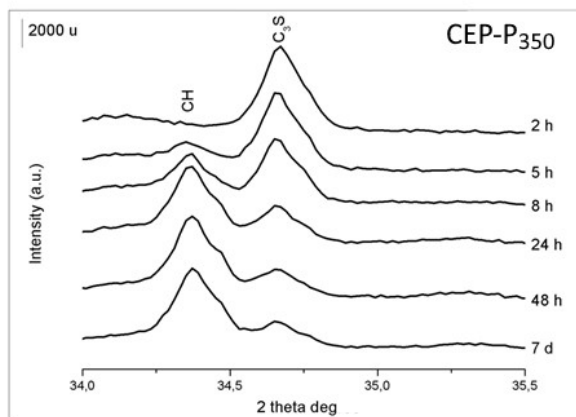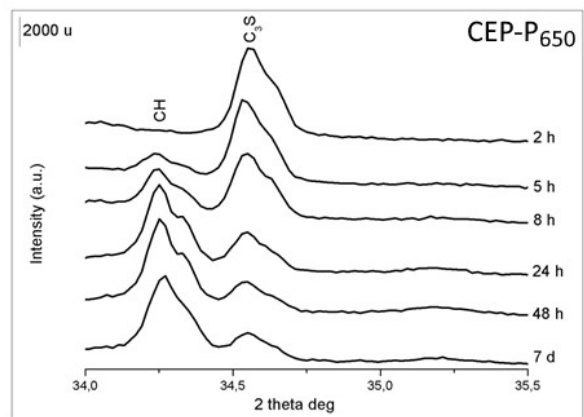

Figure S12 XRPD patterns of the cement paste samples at different hydration times.
